# Supplementary material for: NGIWY-Amide: A Bioinspired Ultrashort Self-Assembled Peptide Gelator for Local Drug Delivery Applications
Source: MDPI journal article supplement (doi:10.3390/pharmaceutics14010133), 2022-01-06
Supplement: s1 [file s1]

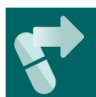

# Supplementary Materials: NGIWY-Amide: A Bioinspired Ultrashort Self-Assembled Peptide Gelator for Local Drug Delivery Applications

Nikoleta F. Theodoroula , Christina Karavasili , Manos C. Vlasiou , Alexandra Primikyri , Christia Nicolaou , Alexandra V. Chatzikonstantinou , Aikaterini-Theodora Chatzitaki , Christos Petrou , Nikolaos Bouropoulos , Constantinos K. Zacharis , Eleftheria Galatou, Yiannis Sarigiannis , Dimitrios G. Fatouros and Ioannis S. Vizirianakis

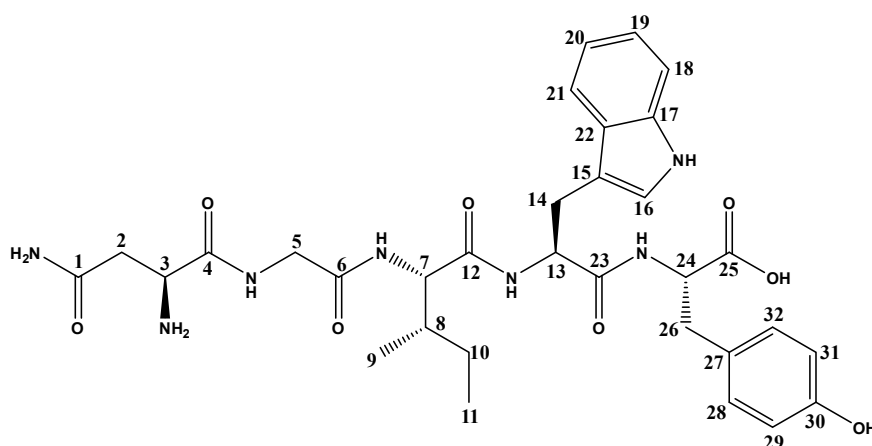

**Table S1.**  $^1\text{H}$  and  $^{13}\text{C}$  NMR chemical shifts ( $\delta$ , ppm) of NGIWY in  $\text{D}_2\text{O}$ .

| H                                    | $\delta$ H   | C  | $\delta$ C | Long range connectivities                                       |
|--------------------------------------|--------------|----|------------|-----------------------------------------------------------------|
| 9                                    | 0,56 (d, 3H) | 9  | 14,4       | 24.5 (C10), 36 (C8), 58.4 (C7)                                  |
| 11                                   | 0,71 (t, 3H) | 11 | 10,1       | 24.5 (C10), 35.9 (C8)                                           |
| 10 $\alpha$                          | 0,96 (m, 1H) | 10 | 24,5       | 10 (C11), 14.4 (C9), 36.02 (C8)                                 |
| 10 $\beta$                           | 1,20 (m, 1H) |    |            |                                                                 |
| 8                                    | 1,60 (m, 1H) | 8  | 36,0       | 50.3 (C3), 54.5 (C24), 128.1 (C27), 130.3 (C28,32), 173.5 (C25) |
| 26 $\alpha$                          | 2,64 (d, 1H) | 26 | 36,1       |                                                                 |
| 26 $\beta$ ,<br>2 $\alpha$ + $\beta$ | 2,81 (m, 3H) | 2  | 36,0       |                                                                 |



|              |                 |               |       |                                                                  |
|--------------|-----------------|---------------|-------|------------------------------------------------------------------|
| <b>14α+β</b> | 3,11 (d, 2H)    | <b>14</b>     | 27,1  | 54.3 (C13), 108.8 (C15), 124.6 (C16), 126.27 (C22), 172.56 (C23) |
| <b>5</b>     | 3,89 (dd, 2H)   | <b>5</b>      | 42,3  |                                                                  |
| <b>7</b>     | 3,99 (d, 1H)    | <b>7</b>      | 58,4  | 14.4 (C11), 24.4 (C10), 36 (C8), 172.79 (C12)                    |
| <b>3</b>     | 4,18 (quin, 1H) | <b>3</b>      | 50,2  |                                                                  |
| <b>24</b>    | 4,31 (q, 1H)    | <b>24</b>     | 54,5  |                                                                  |
| <b>13</b>    | 4,57 (q, 1H)    | <b>13</b>     | 54,3  |                                                                  |
| <b>29,28</b> | 6,70 (d, 2H)    | <b>29, 28</b> | 115,3 | 115.3 (C29), 128 (C27), 154.3 (C30)                              |
| <b>31,32</b> | 6,92 (d, 2H)    | <b>31, 32</b> | 115,3 | 36.19 (C26), 115.2 (C32), 130.4 (C31), 154.4 (C30)               |
| <b>19</b>    | 7,09 (t, 1H)    | <b>19</b>     | 119,4 | 111.7 (C18), 126.6 (C17)                                         |
| <b>16</b>    | 7,12 (s, 1H)    | <b>16</b>     | 124,5 | 108.6 (C15), 126.6 (C17), 136.1 (C22)                            |
| <b>20</b>    | 7,17 (t, 1H)    | <b>20</b>     | 121,9 | 118.3 (C21), 135.9 (C22)                                         |
| <b>18</b>    | 7,42 (d, 1H)    | <b>18</b>     | 111,8 | 119.4 (C19), 126.5 (C17)                                         |
| <b>21</b>    | 7,55 (d, 1H)    | <b>21</b>     | 118,2 | 108.4 (C15), 122 (C20), 136.1 (C22)                              |

Table S2. ADME molecular properties of the pentapeptide.

| Water Solubility    |                                 |
|---------------------|---------------------------------|
| Log <i>S</i> (ESOL) | -2.75                           |
| Solubility          | 1.20e+00 mg/ml ; 1.76e-03 mol/l |
| Class               | Soluble                         |
| Log <i>S</i> (Ali)  | -5.35                           |
| Solubility          | 3.01e-03 mg/ml ; 4.44e-06 mol/l |
| Class               | Moderately soluble              |

|                                            |                                                         |
|--------------------------------------------|---------------------------------------------------------|
| Log <i>S</i> (SILICOS-IT)                  | -6.63                                                   |
| Solubility                                 | 1.61e-04 mg/ml ; 2.37e-07 mol/l                         |
| Class                                      | Poorly soluble                                          |
| <b>Pharmacokinetics</b>                    |                                                         |
| GI absorption                              | Low                                                     |
| BBB permeant                               | No                                                      |
| P-gp substrate                             | Yes                                                     |
| CYP1A2 inhibitor                           | No                                                      |
| CYP2C19 inhibitor                          | No                                                      |
| CYP2C9 inhibitor                           | No                                                      |
| CYP2D6 inhibitor                           | No                                                      |
| CYP3A4 inhibitor                           | No                                                      |
| Log <i>K<sub>p</sub></i> (skin permeation) | -10.52 cm/s                                             |
| <b>Lipophilicity</b>                       |                                                         |
| Log <i>P<sub>o/w</sub></i> (iLOGP)         | 1.02                                                    |
| Log <i>P<sub>o/w</sub></i> (XLOGP3)        | -0.11                                                   |
| Log <i>P<sub>o/w</sub></i> (WLOGP)         | -1.47                                                   |
| Log <i>P<sub>o/w</sub></i> (MLOGP)         | -2.58                                                   |
| Log <i>P<sub>o/w</sub></i> (SILICOS-IT)    | 1.68                                                    |
| Consensus Log <i>P<sub>o/w</sub></i>       | -0.29                                                   |
| <b>Drug-likeness</b>                       |                                                         |
| Lipinski                                   | No; 3 violations: MW>500, NorO>10, NHorOH>5             |
| Ghose                                      | No; 4 violations: MW>480, WLOGP<-0.4, MR>130, #atoms>70 |
| Veber                                      | No; 2 violations: Rotors>10, TPSA>140                   |



|                            |                                                           |
|----------------------------|-----------------------------------------------------------|
| Egan                       | No; 1 violation: TPSA>131.6                               |
| Muegge                     | No; 4 violations: MW>600, TPSA>150,<br>Rotors>15, H-don>5 |
| Bioavailability Score      | 0.17                                                      |
| <b>Medicinal Chemistry</b> |                                                           |
| PAINS                      | 0 alert                                                   |
| Brenk                      | 1 alert: diketo_group                                     |
| Leadlikeness               | No; 2 violations: MW>350, Rotors>7                        |
| Synthetic accessibility    | 5.55                                                      |

Table S3. MM2 Job Type.

|                                    |                    |
|------------------------------------|--------------------|
| <b>Menu Name:</b>                  | Molecular Dynamics |
| <b>Current Options Tab</b>         | 4                  |
| <b>Display Iterations Job Type</b> | Molecular Dynamics |
| <b>Menu Name</b>                   | Molecular Dynamics |
| <b>Current Options Tab</b>         | 4                  |
| <b>Display Iterations Job Type</b> | Molecular Dynamics |
| <b>Minimum RMS Gradient</b>        | 0.00000            |



---

|                                               |                               |
|-----------------------------------------------|-------------------------------|
| <b>Step Interval:</b>                         | 2.00000                       |
| <b>Frame Interval:</b>                        | 10                            |
| <b>Has Terminate Dynamics Terminate Steps</b> | 10000                         |
| <b>Is Heating</b>                             |                               |
| <b>Heating Rate:</b>                          | 1.00000                       |
| <b>Target Temperature</b>                     | 300                           |
| <b>Is Saving Step Data</b>                    |                               |
| <b>Step Data File:</b>                        | C:\Users\chemo\Desktop\NGIWY\ |

---

**Table S4.** Binding energy distribution of the NGIWY-amide with the transport protein.

| Total Energy      | VDW        | HBond             | Elec       |             |                   |            |            |
|-------------------|------------|-------------------|------------|-------------|-------------------|------------|------------|
| -87.1426 Kcal/mol | -43.709    | -43.4337 Kcal/mol | 0 Kcal/mol |             |                   |            |            |
|                   | Kcal/mol   |                   |            |             |                   |            |            |
| Amino Acid        | Energy     | Amino Acid        | Energy     | Amino Acid  | Energy (Kcal/mol) | Amino Acid | Energy     |
| Residue           | (Kcal/mol) | Residue           | (Kcal/mol) | Residue     |                   | Residue    | (Kcal/mol) |
| H-M-GLY-345       | -2.39728   | V-S-PRO-344       | -0.537867  | V-M-SER-352 | -6.73952          | V-M-NAG-2  | -1.258     |
| H-S-ASN-350       | -3.5       | V-M-GLY-345       | -1.0201    | V-S-SER-352 | -0.775445         | V-S-NAG-2  | -7.26528   |
| H-M-GLU-351       | -0.70163   | V-M-PHE-346       | -0.476752  | V-M-LEU-353 | -10.0653          | V-M-FUC-3  | -1.62757   |
| H-M-SER-352       | -3.5       | V-M-SER-347       | -          | V-S-LEU-353 | -5.52406          | V-M-FUC-3  | 0.444912   |
|                   |            |                   | 0.00020353 |             |                   |            |            |
| H-M-LEU-353       | -3.5       | V-M-ASN-350       | -1.3596    | V-M-ILE-354 | -2.87016          |            |            |
| H-M-NAG-2         | -14.2554   | V-S-ASN-350       | -9.34123   | V-S-ILE-354 | -1.05764          |            |            |
| H-S-NAG-2         | -15.5793   | V-M-GLU-351       | -3.36612   | V-M-GLU-358 | -0.140485         |            |            |
| V-M-PRO-344       | -1.40608   | V-S-GLU-351       | -2.07376   | V-S-GLU-358 | -7.37926          |            |            |

**Table S5.** Release kinetic parameters of octreotide acetate, doxorubicin hydrochloride and curcumin from the pentapeptide hydrogel.

| Formulation         | Zero order     |                | First order    |                | Korshmeier-Peppas |        |       | Higuchi        |                | Hixson-Crowell |                 | Weibull        |         |       |
|---------------------|----------------|----------------|----------------|----------------|-------------------|--------|-------|----------------|----------------|----------------|-----------------|----------------|---------|-------|
|                     | R <sup>2</sup> | k <sub>0</sub> | R <sup>2</sup> | k <sub>1</sub> | R <sup>2</sup>    | K      | n     | R <sup>2</sup> | K <sub>H</sub> | R <sup>2</sup> | K <sub>HC</sub> | R <sup>2</sup> | α       | β     |
| 2% w/v<br>NGWIY-OCT | -2.202         | 0.344          | 0.499          | 0.312          | 0.904             | 37.593 | 0.318 | -0.624         | 6.250          | -0.783         | 0.004           | 0.966          | 1.619   | 0.206 |
| 2% w/v<br>NGWIY-DOX | -1.763         | 0.376          | 0.841          | 0.365          | 0.983             | 38.412 | 0.396 | -0.385         | 6.839          | -0.479         | 0.005           | 0.984          | 1.497   | 0.256 |
| 2% w/v<br>NGWIY-CUR | 0.815          | 0.291          | 0.950          | 0.006          | 0.959             | 4.824  | 0.498 | 0.982          | 4.667          | 0.927          | 0.002           | 0.990          | 105.302 | 0.899 |

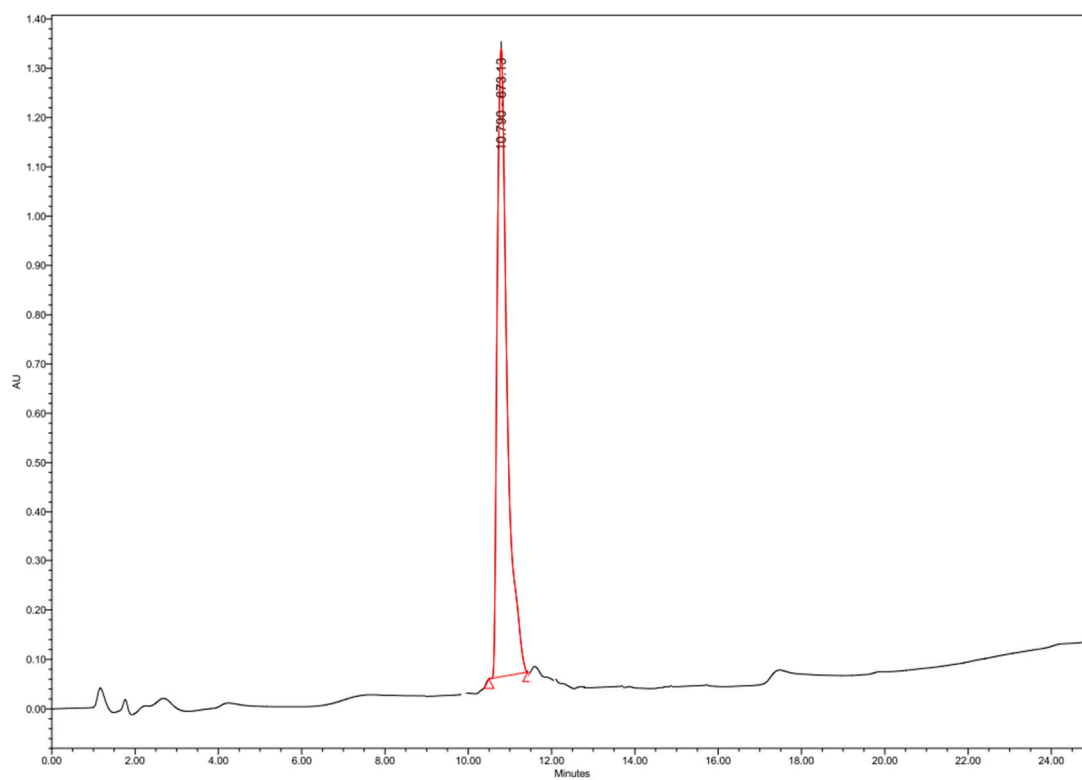

**Figure S1.** HPLC profile of the synthesized peptide at 220 nm.



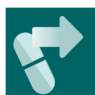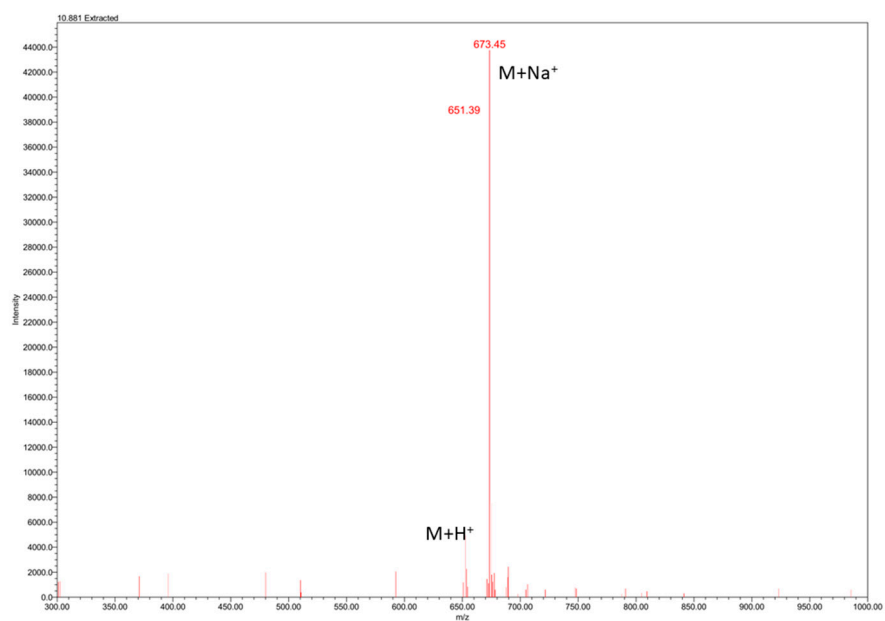

**Figure S2.** Mass spectrum of the main peak at 10.79 min.

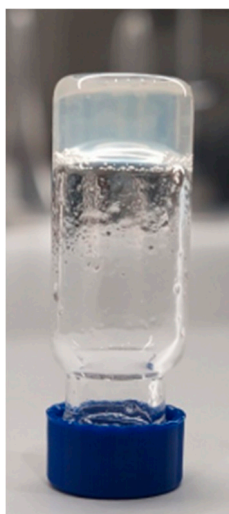

**Figure S3.** Inverted vial of the hydrogel of the peptide NGIWY

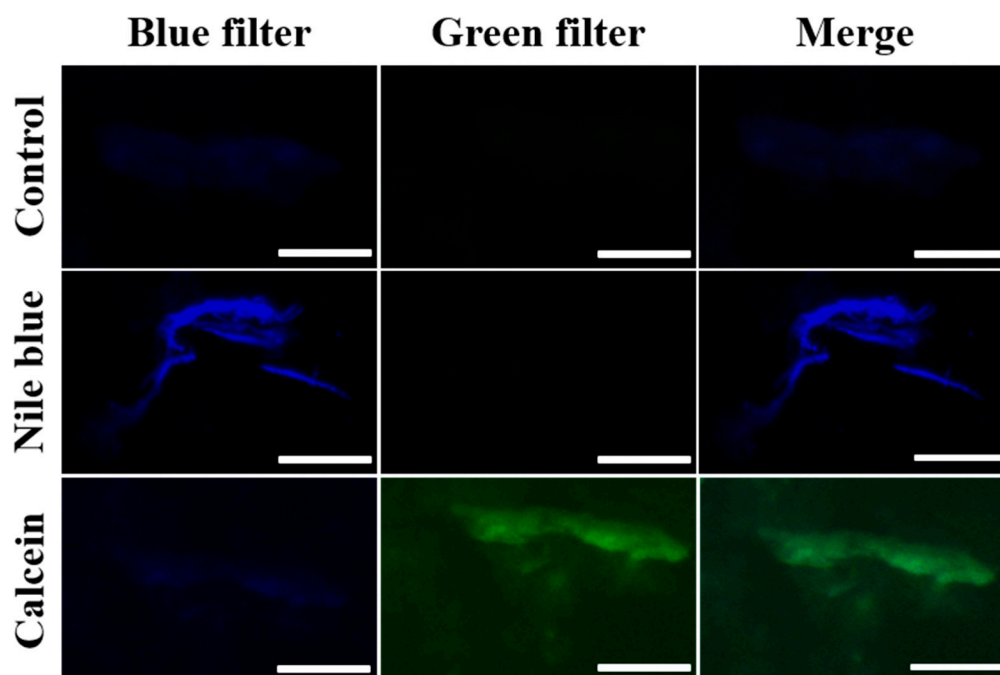

**Figure S4.** Confocal images (63x objective) of a lipophilic (Nile blue) and a hydrophilic (calcein) fluorescent dye distribution within the pentapeptide hydrogel. Scale bar: 10  $\mu\text{m}$ .
